# Supplementary material for: Spatial Distribution, Contamination Levels, and Health Risk Assessment of Potentially Toxic Elements in Household Dust in Cairo City, Egypt
Source: MDPI journal article supplement (doi:10.3390/toxics10080466), 2022-08-11
Supplement: s1 [file s1]

# Supplementary Materials: Spatial Distribution, Contamination Levels and Health Risk Assessment of Potentially Toxic Elements in Household Dust in Cairo City, Egypt

Ahmed Gad, Ahmed Saleh, Hassan I. Farhat, Yehia H. Dawood and Sahar M. Abd El Bakey

**Table S1.** Samples distribution in administrative regions and districts in Cairo City.

| Region.                       | Sample No. | Districts                              | Contributing Sources of Pollution                  |
|-------------------------------|------------|----------------------------------------|----------------------------------------------------|
| New Cairo<br>(S = 82; n = 8)  | 1          | New Cairo3 (S = 11)                    | Construction, Traffic emission, Residential        |
|                               | 2          | New Cairo1 (S = 11)                    |                                                    |
|                               | 3          | New Cairo2 (S = 10)                    |                                                    |
|                               | 4          | New Cairo2 (S = 10)                    |                                                    |
|                               | 5          | Badr1 (S = 10)                         |                                                    |
|                               | 6          | Badr2 (S = 10)                         |                                                    |
|                               | 7          | Al-Shorouk1 (S = 10)                   |                                                    |
|                               | 8          | Al-Shorouk2 (S = 10)                   |                                                    |
| Eastern<br>(S = 97; n = 8)    | 9          | Al-Salam (S = 14)                      | Traffic emission, Residential                      |
|                               | 10         | Al-Nozha (S = 12)                      |                                                    |
|                               | 11         | Nasr City1 (S = 11)                    |                                                    |
|                               | 12         | Nasr City2 (S = 11)                    |                                                    |
|                               | 13         | Heliopolis (S = 11)                    |                                                    |
|                               | 14         | Ain Shams (S = 12)                     |                                                    |
|                               | 15         | Al-Marg (S = 13)                       |                                                    |
|                               | 16         | Al-Matariya (S = 13)                   |                                                    |
| Northern<br>(S = 83; n = 6)   | 17         | Al-Zaytoun + Al-Ameryia (S = 16)       | Industrial Activity, Traffic emission, Residential |
|                               | 18         | Hadaeq Al-Qoba (S = 12)                |                                                    |
|                               | 19         | Al-Zawya Al-Hamra (S = 14)             |                                                    |
|                               | 20         | Al-Shrabiya (S = 13)                   |                                                    |
|                               | 21         | Al-Sahel (S = 13)                      |                                                    |
|                               | 22         | Rod Al-Farag + Shoubra (S = 15)        |                                                    |
| Western<br>(S = 86; n = 6)    | 23         | Al-Azbakiya + Boulaq (S = 15)          | Traffic emission, Residential                      |
|                               | 24         | Al-Waily (S = 13)                      |                                                    |
|                               | 25         | Bab Al-Shaariya + Al-Mosky (S = 16)    |                                                    |
|                               | 26         | Abdin + Gharb Al-Qahira (S = 16)       |                                                    |
|                               | 27         | Wasat Al-Qahira (S = 13)               |                                                    |
|                               | 28         | Monshat Naser (S = 13)                 |                                                    |
| Southern<br>(S = 125; n = 10) | 29         | Al-Mokattam (S = 11)                   | Industrial Activity, Traffic emission, Residential |
|                               | 30         | Al-Khalifa + Al-Sayida Zeinab (S = 15) |                                                    |
|                               | 31         | Misr Al-Qadima (S = 10)                |                                                    |
|                               | 32         | Dar Al-Salam + Al-Maadi (S = 16)       |                                                    |
|                               | 33         | Al-Basatin (S = 11)                    |                                                    |
|                               | 34         | Tora (S = 12)                          |                                                    |
|                               | 35         | Al-Masara (S = 12)                     |                                                    |
|                               | 36         | 15 <sup>th</sup> of May (S = 12)       |                                                    |
|                               | 37         | Helwan (S = 13)                        |                                                    |
|                               | 38         | Al-Tebin (S = 13)                      |                                                    |

S = subsamples; n = composite samples.

Table S2. Calculated  $C_f$  and  $C_{deg}$  values.

| Sample No. | Region    | Al   | As   | Cd    | Co   | Cr   | Cu   | Fe   | Hg    | Mn   | Mo   | Ni   | Pb    | V    | Zn    | $C_{deg}$ |
|------------|-----------|------|------|-------|------|------|------|------|-------|------|------|------|-------|------|-------|-----------|
| 1          | New Cairo | 0.10 | 1.73 | 3.33  | 0.66 | 1.06 | 2.41 | 0.53 | 2.80  | 0.56 | 1.07 | 1.00 | 2.71  | 0.62 | 3.37  | 21.92     |
| 2          |           | 0.08 | 1.47 | 3.33  | 0.46 | 0.80 | 2.10 | 0.36 | 0.60  | 0.44 | 0.73 | 0.74 | 2.44  | 0.47 | 2.44  | 16.44     |
| 3          |           | 0.09 | 2.00 | 5.56  | 0.56 | 0.94 | 1.66 | 0.41 | 12.00 | 0.47 | 0.87 | 0.87 | 2.22  | 0.55 | 2.62  | 30.81     |
| 4          |           | 0.08 | 1.67 | 3.33  | 0.49 | 0.83 | 1.38 | 0.40 | 37.00 | 0.46 | 0.87 | 0.77 | 2.09  | 0.48 | 2.41  | 52.25     |
| 5          |           | 0.09 | 2.20 | 5.56  | 0.66 | 0.89 | 2.32 | 0.46 | 1.00  | 0.55 | 1.00 | 0.82 | 2.63  | 0.57 | 3.52  | 22.25     |
| 6          |           | 0.09 | 2.00 | 4.44  | 0.60 | 0.91 | 2.24 | 0.47 | 0.60  | 0.57 | 0.93 | 0.82 | 2.82  | 0.57 | 3.45  | 20.52     |
| 7          |           | 0.09 | 2.67 | 8.89  | 0.74 | 1.11 | 3.52 | 0.52 | 3.60  | 0.58 | 1.67 | 1.01 | 3.09  | 0.83 | 3.61  | 31.93     |
| 8          |           | 0.09 | 3.07 | 10.00 | 0.74 | 1.09 | 3.87 | 0.55 | 1.80  | 0.57 | 1.60 | 1.08 | 3.21  | 0.90 | 3.75  | 32.31     |
| 9          | Eastern   | 0.10 | 1.93 | 6.67  | 0.76 | 1.31 | 2.81 | 0.51 | 3.00  | 0.58 | 1.00 | 1.13 | 4.19  | 0.73 | 4.04  | 28.76     |
| 10         |           | 0.07 | 2.33 | 14.44 | 0.61 | 1.54 | 4.72 | 0.50 | 18.40 | 0.58 | 1.20 | 1.28 | 5.45  | 0.63 | 4.75  | 56.51     |
| 11         |           | 0.09 | 2.73 | 31.11 | 0.88 | 2.00 | 6.74 | 0.59 | 9.20  | 0.68 | 2.13 | 1.58 | 6.09  | 0.72 | 6.38  | 70.92     |
| 12         |           | 0.11 | 2.73 | 14.44 | 0.89 | 2.14 | 8.20 | 0.63 | 3.20  | 0.73 | 2.47 | 1.73 | 5.91  | 0.77 | 6.46  | 50.41     |
| 13         |           | 0.09 | 1.93 | 6.67  | 0.72 | 1.14 | 2.18 | 0.46 | 6.40  | 0.54 | 0.80 | 1.03 | 2.83  | 0.63 | 3.30  | 28.73     |
| 14         |           | 0.09 | 2.33 | 8.89  | 0.66 | 1.71 | 5.25 | 0.57 | 3.40  | 0.63 | 2.67 | 1.78 | 5.87  | 0.70 | 4.87  | 39.42     |
| 15         |           | 0.10 | 2.80 | 18.89 | 1.09 | 2.31 | 9.98 | 0.65 | 4.80  | 0.78 | 2.40 | 2.23 | 7.12  | 0.68 | 9.66  | 63.48     |
| 16         |           | 0.20 | 4.13 | 23.33 | 1.20 | 1.57 | 9.92 | 0.69 | 17.00 | 0.85 | 1.67 | 2.95 | 13.39 | 1.10 | 15.27 | 93.26     |
| 17         | Northern  | 0.09 | 2.27 | 10.00 | 0.98 | 2.31 | 7.54 | 0.71 | 4.00  | 0.78 | 3.80 | 2.06 | 8.53  | 0.75 | 7.17  | 50.97     |
| 18         |           | 0.10 | 2.33 | 10.00 | 0.75 | 1.91 | 6.63 | 0.64 | 2.80  | 0.72 | 2.87 | 2.23 | 8.17  | 0.73 | 6.49  | 46.37     |
| 19         |           | 0.10 | 1.87 | 12.22 | 0.78 | 1.51 | 5.99 | 0.63 | 6.60  | 0.66 | 1.93 | 1.59 | 10.96 | 0.72 | 4.90  | 50.46     |
| 20         |           | 0.09 | 2.33 | 15.56 | 0.78 | 1.66 | 5.74 | 0.60 | 15.60 | 0.65 | 2.67 | 1.66 | 8.01  | 0.73 | 5.23  | 61.30     |
| 21         |           | 0.09 | 1.93 | 14.44 | 0.67 | 1.80 | 6.15 | 0.55 | 2.60  | 0.64 | 2.47 | 1.74 | 5.44  | 0.70 | 5.15  | 44.37     |
| 22         |           | 0.10 | 1.87 | 14.44 | 0.77 | 1.17 | 3.09 | 0.53 | 0.80  | 0.55 | 1.07 | 1.07 | 3.19  | 0.78 | 3.44  | 32.87     |
| 23         | Western   | 0.18 | 3.13 | 22.22 | 1.10 | 1.66 | 7.01 | 0.65 | 38.80 | 0.90 | 2.13 | 2.23 | 9.70  | 1.02 | 11.73 | 102.46    |
| 24         |           | 0.10 | 2.40 | 11.11 | 0.78 | 1.91 | 8.05 | 0.59 | 3.40  | 0.67 | 1.73 | 1.82 | 5.50  | 0.63 | 6.93  | 45.62     |
| 25         |           | 0.11 | 2.27 | 13.33 | 0.87 | 2.31 | 8.49 | 0.61 | 4.00  | 0.71 | 2.07 | 1.79 | 5.84  | 0.72 | 6.83  | 49.94     |
| 26         |           | 0.17 | 3.07 | 7.78  | 0.91 | 1.17 | 4.77 | 0.53 | 3.60  | 0.60 | 1.13 | 2.01 | 4.87  | 0.83 | 11.08 | 42.50     |
| 27         |           | 0.11 | 2.07 | 11.11 | 0.72 | 1.06 | 3.48 | 0.43 | 2.00  | 0.53 | 0.93 | 1.23 | 4.88  | 0.72 | 6.94  | 36.21     |
| 28         |           | 0.21 | 3.87 | 13.33 | 1.13 | 1.34 | 4.07 | 0.66 | 1.60  | 0.77 | 1.47 | 1.69 | 5.80  | 1.02 | 7.58  | 44.53     |
| 29         | Southern  | 0.07 | 1.87 | 8.89  | 0.43 | 0.83 | 3.97 | 0.40 | 2.40  | 0.46 | 0.87 | 1.19 | 3.52  | 0.40 | 6.89  | 32.17     |
| 30         |           | 0.09 | 2.33 | 10.00 | 0.55 | 0.89 | 4.15 | 0.43 | 1.60  | 0.51 | 1.00 | 1.35 | 3.78  | 0.53 | 7.20  | 34.41     |
| 31         |           | 0.14 | 4.00 | 7.78  | 1.33 | 1.14 | 3.44 | 0.77 | 1.20  | 0.99 | 1.73 | 1.48 | 3.52  | 1.00 | 5.10  | 33.61     |
| 32         |           | 0.13 | 3.47 | 7.78  | 1.24 | 1.26 | 3.07 | 0.76 | 1.60  | 1.00 | 1.73 | 1.50 | 3.91  | 0.95 | 5.03  | 33.41     |
| 33         |           | 0.13 | 4.93 | 8.89  | 1.98 | 0.91 | 2.52 | 1.01 | 1.00  | 1.44 | 2.00 | 1.74 | 2.55  | 1.12 | 5.93  | 36.14     |
| 34         |           | 0.10 | 2.60 | 7.78  | 0.91 | 1.26 | 3.25 | 0.61 | 1.00  | 0.75 | 1.93 | 1.31 | 3.39  | 0.73 | 4.23  | 29.84     |
| 35         |           | 0.18 | 4.33 | 10.00 | 1.68 | 0.97 | 2.26 | 0.87 | 1.00  | 1.15 | 1.67 | 1.65 | 2.74  | 1.08 | 7.07  | 36.64     |
| 36         |           | 0.13 | 3.47 | 12.22 | 1.45 | 1.26 | 4.39 | 0.83 | 2.00  | 1.09 | 1.87 | 1.65 | 3.13  | 0.92 | 5.65  | 40.04     |
| 37         |           | 0.12 | 3.07 | 10.00 | 1.23 | 1.74 | 6.57 | 0.73 | 2.80  | 0.90 | 2.00 | 1.72 | 4.55  | 0.85 | 6.28  | 42.56     |
| 38         |           | 0.22 | 4.40 | 12.22 | 1.37 | 1.26 | 3.31 | 0.76 | 1.60  | 0.94 | 1.60 | 1.66 | 4.75  | 1.08 | 7.25  | 42.41     |

**Table S3.** Calculated non-cancer HQ<sub>ing</sub>, HQ<sub>der</sub>, and HQ<sub>inh</sub> values.

|           | Children              |                       |                       | Adults                |                       |                       |
|-----------|-----------------------|-----------------------|-----------------------|-----------------------|-----------------------|-----------------------|
|           | HQ <sub>ing</sub>     | HQ <sub>der</sub>     | HQ <sub>inh</sub>     | HQ <sub>ing</sub>     | HQ <sub>der</sub>     | HQ <sub>inh</sub>     |
| <b>Al</b> | $4.69 \times 10^{-2}$ | $2.53 \times 10^{-3}$ | $1.83 \times 10^{-3}$ | $2.49 \times 10^{-2}$ | $3.44 \times 10^{-4}$ | $1.28 \times 10^{-3}$ |
| <b>As</b> | $6.89 \times 10^{-2}$ | $2.72 \times 10^{-2}$ | $3.85 \times 10^{-6}$ | $3.66 \times 10^{-2}$ | $3.71 \times 10^{-3}$ | $2.69 \times 10^{-6}$ |
| <b>Cd</b> | $5.13 \times 10^{-3}$ | $2.77 \times 10^{-3}$ | $2.87 \times 10^{-7}$ | $2.73 \times 10^{-3}$ | $3.77 \times 10^{-4}$ | $2.00 \times 10^{-7}$ |
| <b>Co</b> | $2.32 \times 10^{-3}$ | $1.56 \times 10^{-5}$ | $4.53 \times 10^{-4}$ | $1.23 \times 10^{-3}$ | $2.13 \times 10^{-6}$ | $3.17 \times 10^{-4}$ |
| <b>Cr</b> | $8.34 \times 10^{-2}$ | $2.25 \times 10^{-2}$ | $4.89 \times 10^{-4}$ | $4.43 \times 10^{-2}$ | $3.07 \times 10^{-3}$ | $3.42 \times 10^{-4}$ |
| <b>Cu</b> | $1.50 \times 10^{-2}$ | $2.70 \times 10^{-4}$ | $8.36 \times 10^{-7}$ | $7.99 \times 10^{-3}$ | $3.68 \times 10^{-5}$ | $5.84 \times 10^{-7}$ |
| <b>Hg</b> | $5.13 \times 10^{-3}$ | $3.95 \times 10^{-4}$ | $9.83 \times 10^{-7}$ | $2.73 \times 10^{-3}$ | $5.38 \times 10^{-5}$ | $6.87 \times 10^{-7}$ |
| <b>Mn</b> | $5.48 \times 10^{-2}$ | $6.43 \times 10^{-3}$ | $8.57 \times 10^{-3}$ | $2.91 \times 10^{-2}$ | $8.76 \times 10^{-4}$ | $5.99 \times 10^{-3}$ |
| <b>Mo</b> | $2.59 \times 10^{-3}$ | $3.68 \times 10^{-5}$ | -                     | $1.38 \times 10^{-3}$ | $5.02 \times 10^{-6}$ | -                     |
| <b>Ni</b> | $7.75 \times 10^{-3}$ | $1.55 \times 10^{-4}$ | $4.20 \times 10^{-7}$ | $4.12 \times 10^{-3}$ | $2.11 \times 10^{-5}$ | $2.94 \times 10^{-7}$ |
| <b>Pb</b> | $1.46 \times 10^{-1}$ | $5.26 \times 10^{-3}$ | $8.80 \times 10^{-6}$ | $7.77 \times 10^{-2}$ | $7.16 \times 10^{-4}$ | $6.16 \times 10^{-6}$ |
| <b>V</b>  | $3.37 \times 10^{-2}$ | $1.82 \times 10^{-2}$ | $1.88 \times 10^{-6}$ | $1.79 \times 10^{-2}$ | $2.47 \times 10^{-3}$ | $1.32 \times 10^{-6}$ |
| <b>Zn</b> | $7.19 \times 10^{-3}$ | $1.94 \times 10^{-4}$ | $4.02 \times 10^{-7}$ | $3.82 \times 10^{-3}$ | $2.64 \times 10^{-5}$ | $2.81 \times 10^{-7}$ |

**Table S4.** Calculated cancer LADD<sub>ing</sub>, LADD<sub>der</sub>, and LADD<sub>inh</sub> values.

|           | LADD <sub>ing</sub>   | LADD <sub>der</sub>   | LADD <sub>inh</sub>    |
|-----------|-----------------------|-----------------------|------------------------|
| <b>As</b> | $8.14 \times 10^{-6}$ | $9.39 \times 10^{-7}$ | $5.68 \times 10^{-9}$  |
| <b>Cd</b> | $5.12 \times 10^{-7}$ | -                     | $5.88 \times 10^{-10}$ |
| <b>Cr</b> | $3.29 \times 10^{-5}$ | $2.07 \times 10^{-7}$ | $1.87 \times 10^{-9}$  |
| <b>Ni</b> | $6.91 \times 10^{-5}$ | -                     | $2.37 \times 10^{-9}$  |
| <b>Pb</b> | $1.14 \times 10^{-6}$ | -                     | $3.91 \times 10^{-10}$ |
